# Supplementary material for: A Comprehensive Analysis of Plasma Cytokines and Metabolites Shows an Association between Galectin-9 and Changes in Peripheral Lymphocyte Subset Percentages Following Coix Seed Consumption
Source: MDPI journal article supplement (doi:10.3390/nu14091696), 2022-04-19
Supplement: s1 [file s1]

Table S3 Plasma metabolite concentrations

| Chem_ID | Name                   | Coix seed |         |         |         |               | Control  |         |          |         |           |
|---------|------------------------|-----------|---------|---------|---------|---------------|----------|---------|----------|---------|-----------|
|         |                        | Pre       |         | Post    |         | p-value       | Pre      |         | Post     |         | p-value   |
|         |                        | Mean      | SD      | Mean    | SD      |               | Mean     | SD      | Mean     | SD      |           |
| 1       | Ornithine              | 86.152    | 12.299  | 87.322  | 10.957  | 0.6271        | 76.913   | 6.197   | 72.315   | 13.837  | 0.2830    |
| 2       | Choline                | 21.995    | 2.881   | 21.728  | 2.26    | 0.9219        | 23.253   | 3.333   | 22.704   | 5.073   | 0.7858    |
| 3       | Lysine                 | 246.675   | 22.396  | 229.857 | 31.276  | 0.1086        | 212.361  | 35.421  | 209.681  | 27.344  | 0.6406    |
| 4       | Arginine               | 74.117    | 9.865   | 74.046  | 12.735  | 0.9750        | 88.868   | 17.377  | 85.385   | 13.182  | 0.3896    |
| 5       | Histidine              | 77.232    | 9.903   | 77.952  | 12.741  | 0.7515        | 71.096   | 6.898   | 67.037   | 12.847  | 0.2993    |
| 6       | Creatinine             | 66.355    | 8.19    | 59.674  | 5.94    | 0.0017 **     | 64.205   | 8.077   | 60.045   | 10.131  | 0.0414 *  |
| 7       | beta-Alanine           | 5.602     | 1.264   | 6.979   | 2.572   | 0.1754        | 5.614    | 1.442   | 4.949    | 2.046   | 0.6406    |
| 8       | GABA                   | 9.284     | 6.928   | 11.157  | 7.594   | 0.0239 *      | 10.46    | 5.78    | 12.469   | 6.57    | 0.1443    |
| 9       | Glycine                | 267.182   | 37.898  | 279.169 | 50.271  | 0.2325        | 264.442  | 24.31   | 274.993  | 23.758  | 0.1704    |
| 10      | Creatine               | 24.767    | 7.11    | 25.94   | 12.676  | 1.0000        | 20.057   | 9.508   | 18.308   | 3.983   | 0.3828    |
| 11      | Alanine                | 386.799   | 48.539  | 409.935 | 75.933  | 0.1342        | 359.164  | 44.575  | 360.086  | 67.01   | 0.9538    |
| 12      | Sarcosine              | 1.543     | 0.564   | 1.065   | 1.262   | 0.2863        | 1.61     | 0.699   | 0.788    | 0.597   | 0.0547    |
| 13      | Serine                 | 134.712   | 18.43   | 133.084 | 24.08   | 0.7253        | 126.493  | 5.349   | 130.861  | 13.625  | 0.4176    |
| 14      | Valine                 | 230.077   | 41.23   | 220.656 | 26.711  | 0.3247        | 216.842  | 33.295  | 215.664  | 26.985  | 0.9278    |
| 15      | Isoleucine             | 61.295    | 12.907  | 56.348  | 10.958  | 0.3429        | 57.214   | 6.913   | 56.422   | 7.428   | 0.9453    |
| 16      | Leucine                | 135.868   | 21.281  | 132.39  | 15.906  | 0.3960        | 128.007  | 13.926  | 124.824  | 12.649  | 0.6961    |
| 17      | Asparagine             | 51.43     | 7.123   | 52.845  | 5.869   | 0.4620        | 47.476   | 6.318   | 47.652   | 7.432   | 0.9431    |
| 18      | Threonine              | 138.446   | 24.025  | 143.914 | 32.126  | 0.5242        | 116.032  | 16.371  | 113.544  | 22.65   | 0.7488    |
| 19      | Anthranilic acid       | 0.323     | 0.164   | 0.148   | 0       | 0.0084 **     | 0.35     | 0.358   | 0.148    | 0       | 0.1558    |
| 20      | Methionine             | 23.598    | 3.522   | 20.997  | 2.503   | 0.1202        | 21.096   | 2.117   | 18.283   | 3.095   | 0.0452 *  |
| 21      | Glutamine              | 453.049   | 38.75   | 474.219 | 49.404  | 0.1341        | 468.709  | 47.288  | 467.022  | 66.434  | 0.9326    |
| 22      | Proline                | 155.442   | 33.371  | 165.175 | 33.056  | 0.3138        | 157.559  | 34.979  | 161.95   | 45.936  | 0.6672    |
| 23      | Dimethylglycine        | 3.829     | 1.257   | 3.78    | 0.749   | 0.8673        | 4.012    | 0.974   | 4.594    | 1.395   | 0.2370    |
| 24      | Glutamic acid          | 177.621   | 32.691  | 190.262 | 41.07   | 0.2539        | 191.162  | 31.296  | 207.068  | 41.475  | 0.3585    |
| 25      | Tryptophan             | 56.025    | 9.952   | 60.571  | 9.835   | 0.2312        | 51.753   | 8.416   | 55.982   | 8.017   | 0.2019    |
| 26      | Hypoxanthine           | 13.112    | 2.303   | 13.35   | 2.663   | 0.7141        | 12.074   | 1.942   | 14.323   | 1.423   | 0.0051 ** |
| 27      | Citrulline             | 26.376    | 6.821   | 29.838  | 5.495   | 0.0241 *      | 28.127   | 4.522   | 28.002   | 5.617   | 0.9536    |
| 28      | Phenylalanine          | 60.702    | 8.367   | 86.05   | 49.047  | 0.0645        | 60.891   | 6.941   | 72.341   | 12.814  | 0.0645    |
| 29      | Betaine                | 45.25     | 10.86   | 46.373  | 9.615   | 0.7776        | 55.544   | 17.104  | 54.639   | 15.624  | 0.8495    |
| 30      | Cysteine               | 3.932     | 1.159   | 2.625   | 1.049   | 0.0144 *      | 3.63     | 0.697   | 2.19     | 1.345   | 0.0582    |
| 31      | Tyrosine               | 56.729    | 6.997   | 60.116  | 7.922   | 0.1537        | 54.341   | 5.363   | 53.403   | 4.307   | 0.7168    |
| 32      | Aspartic acid          | 20.444    | 2.555   | 20.29   | 3.383   | 0.8706        | 21.474   | 3.753   | 23.227   | 3.554   | 0.3041    |
| 33      | Hydroxyproline         | 18.201    | 7.753   | 18.047  | 6.951   | 1.0000        | 17.312   | 6.21    | 15.632   | 4.797   | 0.5417    |
| 34      | Uracil                 | 3.246     | 0.959   | 2.569   | 1.257   | 0.1953        | 3.727    | 1.109   | 3.307    | 0.762   | 0.3828    |
| 35      | Inosine                | 1.889     | 1.54    | 0.887   | 1.384   | 0.1055        | 0.559    | 0.363   | 2.157    | 1.464   | 0.0179 *  |
| 36      | Uridine                | 9.943     | 1.168   | 9.391   | 1.816   | 0.4112        | 10.925   | 2.216   | 10.207   | 1.904   | 0.6406    |
| 37      | Gluconic acid          | 2.437     | 0.254   | 2.463   | 0.335   | 0.7727        | 3.152    | 1.614   | 3.463    | 1.627   | 0.1484    |
| 38      | 3-Hydroxybutyric acid  | 68.277    | 70.284  | 59.229  | 45.023  | 0.4316        | 80.078   | 109.002 | 93.743   | 132.494 | 0.6406    |
| 39      | 2-Hydroxybutyric acid  | 45.52     | 14.984  | 41.422  | 17.635  | 0.3490        | 33.818   | 17.319  | 45.885   | 28.604  | 0.0781    |
| 40      | 2-Oxoisovaleric acid   | 11.726    | 2.527   | 13.746  | 3.15    | 0.0893        | 10.548   | 2.196   | 12.719   | 3.213   | 0.1550    |
| 41      | Lactic acid            | 2357.051  | 365.685 | 2578.58 | 356.212 | 0.1857        | 2481.512 | 595.633 | 2562.396 | 484.297 | 0.5357    |
| 42      | D-Ribulose 5-phosphate | 0.477     | 0.316   | 0.333   | 0.453   | 0.1551        | 0.271    | 0.216   | 0.569    | 0.451   | 0.1240    |
| 43      | Glycolic acid          | 40.741    | 17.426  | 53.421  | 16.734  | 0.0490 *      | 34.722   | 9.372   | 53.225   | 15.079  | 0.0391 *  |
| 44      | Pyruvic acid           | 27.451    | 9.63    | 35.462  | 25.727  | 0.4316        | 28.478   | 13.701  | 25.916   | 11.951  | 0.6695    |
| 45      | 3-phosphoglyceric acid | 0.189     | 0.192   | 0.102   | 0.065   | 0.2936        | 0.12     | 0.099   | 0.092    | 0.06    | 0.9453    |
| 46      | Succinic acid          | 6.518     | 0.488   | 6.892   | 1.237   | 0.3935        | 6.631    | 0.601   | 7.217    | 1.929   | 0.3884    |
| 47      | Malic acid             | 3.227     | 0.679   | 4.204   | 0.76    | < 0.0001 **** | 3.183    | 0.403   | 4.617    | 1.337   | 0.0369 *  |
| 48      | 2-Oxoglutaric acid     | 0.223     | 0.115   | 0.535   | 0.695   | 0.2807        | 0.198    | 0.073   | 0.549    | 0.329   | 0.0591    |
| 49      | Fumaric acid           | 0.76      | 0.445   | 0.531   | 0.391   | 0.4069        | 0.808    | 0.461   | 0.693    | 0.546   | 0.7364    |
| 50      | Citric acid            | 56.834    | 13.97   | 64.985  | 10.435  | 0.0800        | 53.587   | 7.881   | 69.819   | 18.359  | 0.0078 ** |
| 51      | cis-Aconitic acid      | 1.041     | 0.344   | 1.411   | 0.339   | 0.0023 **     | 1.018    | 0.386   | 1.415    | 0.462   | 0.1386    |
| 52      | Isocitric acid         | 1.27      | 0.425   | 1.611   | 0.393   | 0.0251 *      | 1.232    | 0.476   | 1.602    | 0.547   | 0.2261    |

Concentrations: nmole/ml

\*, p &lt; 0.05; \*\*, p &lt; 0.01, \*\*\*, p &lt; 0.001, \*\*\*\*, p &lt; 0.0001
