# Supplementary material for: A Comprehensive Analysis of Plasma Cytokines and Metabolites Shows an Association between Galectin-9 and Changes in Peripheral Lymphocyte Subset Percentages Following Coix Seed Consumption
Source: MDPI journal article supplement (doi:10.3390/nu14091696), 2022-04-19
Supplement: s1 [file s1]

Table S2 Plasma cytokine concentrations

| Cyto-ID | Name                        | Coix seed |          |          |          |           | Control  |          |          |          |          |
|---------|-----------------------------|-----------|----------|----------|----------|-----------|----------|----------|----------|----------|----------|
|         |                             | Pre       |          | Post     |          | p-value   | Pre      |          | Post     |          | p-value  |
|         |                             | Mean      | SD       | Mean     | SD       |           | Mean     | SD       | Mean     | SD       |          |
| 1       | IL-5 (pg/mL)                | 1.583     | 1.579    | 1.597    | 1.845    | 0.7874    | 1.518    | 0.608    | 1.746    | 1.114    | 0.4443   |
| 2       | IL-13 (pg/mL)               | 7.43      | 8.188    | 7.449    | 7.737    | 1.0000    | 10.051   | 4.734    | 10.189   | 5.268    | 0.8989   |
| 3       | IL-2 (pg/mL)                | 3.386     | 5.545    | 3.281    | 5.124    | 1.0000    | 1.573    | 0.509    | 1.752    | 0.703    | 0.3597   |
| 4       | IL-6 (pg/mL)                | 2.841     | 3.296    | 2.166    | 2.214    | 0.5286    | 2.565    | 0.8      | 6.016    | 10.461   | 0.9453   |
| 5       | IL-9 (pg/mL)                | 1.989     | 1.841    | 1.691    | 1.696    | 0.0801    | 1.83     | 0.721    | 1.819    | 0.853    | 0.9378   |
| 6       | IL-10 (pg/mL)               | 0.54      | 0.36     | 0.456    | 0.318    | 0.1415    | 0.666    | 0.424    | 0.601    | 0.266    | 0.5469   |
| 7       | IFN- $\gamma$ (pg/mL)       | 4.59      | 8.251    | 4.455    | 8.021    | 0.4753    | 2.407    | 2.098    | 2.938    | 1.766    | 0.2945   |
| 8       | TNF- $\alpha$ (pg/mL)       | 6.792     | 3.568    | 2.704    | 2.673    | 0.0020 ** | 9.527    | 5.652    | 2.69     | 2.366    | 0.0234 * |
| 9       | IL-17A (pg/mL)              | 0.276     | 0.303    | 0.298    | 0.313    | 0.2719    | 0.202    | 0.136    | 0.375    | 0.46     | 0.5294   |
| 10      | IL-17F (pg/mL)              | 1.607     | 2.193    | 1.58     | 2.391    | 0.5281    | 4.041    | 6.136    | 4.351    | 7.5      | 0.7422   |
| 11      | IL-4 (pg/mL)                | 3.311     | 5.269    | 3.223    | 5.012    | 0.7893    | 2.726    | 2.09     | 3.31     | 2.424    | 0.2012   |
| 12      | IL-22 (pg/mL)               | 2.018     | 4.001    | 1.135    | 1.362    | 0.3096    | 0.596    | 0.351    | 0.728    | 0.579    | 0.4925   |
| 13      | TSLP (pg/mL)                | 5.104     | 6.86     | 4.6      | 6.239    | 0.2084    | 3.947    | 5.693    | 4.85     | 8.226    | 0.5896   |
| 14      | IL-1 $\alpha$ (pg/mL)       | 37.788    | 42.039   | 33.276   | 40.084   | 0.2049    | 54.122   | 45.05    | 54.111   | 53.596   | 0.7422   |
| 15      | IL-1 $\beta$ (pg/mL)        | 9.471     | 12.865   | 8.272    | 12.006   | 0.0801    | 11.307   | 14.421   | 12.887   | 21.842   | 0.4002   |
| 16      | GM-CSF (pg/mL)              | 3.604     | 6.894    | 2.896    | 6.247    | 0.0756    | 7.385    | 12.616   | 9.078    | 18.443   | 1.0000   |
| 17      | IFN- $\alpha$ 2 (pg/mL)     | 8.74      | 12.596   | 7.809    | 11.102   | 0.4922    | 13.844   | 19.107   | 15.3     | 25.755   | 0.6406   |
| 18      | IL-23 (pg/mL)               | 17.78     | 24.769   | 15.607   | 22.976   | 0.1073    | 7.358    | 7.568    | 6.761    | 7.019    | 0.7874   |
| 19      | IL-12p40 (pg/mL)            | 368.414   | 435.124  | 339.762  | 413.921  | 0.5566    | 582.291  | 797.486  | 645.626  | 1027.384 | 1.0000   |
| 20      | IL-12p70 (pg/mL)            | 3.086     | 7.502    | 2.851    | 6.265    | 1.0000    | 1.95     | 3.004    | 3.336    | 5.511    | 0.1057   |
| 21      | IL-15 (pg/mL)               | 124.323   | 144.205  | 118.526  | 135.775  | 0.5896    | 121.219  | 126.648  | 143.787  | 146.675  | 0.0935   |
| 22      | IL-18 (pg/mL)               | 106.747   | 32.743   | 102.621  | 39.53    | 0.5165    | 94.796   | 32.279   | 94.53    | 37.005   | 0.9642   |
| 23      | IL-11 (pg/mL)               | 58.423    | 64.521   | 55.387   | 59.317   | 0.9442    | 59.224   | 58.995   | 72.305   | 74.688   | 0.0346 * |
| 24      | IL-27 (pg/mL)               | 37.651    | 27.292   | 34.647   | 31.864   | 0.0840    | 48.172   | 69.755   | 66.133   | 122.266  | 0.7422   |
| 25      | IL-33 (pg/mL)               | 115.561   | 124.633  | 102.284  | 116.863  | 0.0840    | 189.766  | 150.957  | 200.745  | 214.557  | 0.3828   |
| 26      | sFas (pg/mL)                | 464.096   | 173.161  | 423.123  | 213.74   | 0.2671    | 534.895  | 327.705  | 473.541  | 318.508  | 0.2297   |
| 27      | sFasL (pg/mL)               | 14.202    | 16.614   | 13.961   | 15.812   | 0.8336    | 11.919   | 11.897   | 9.478    | 8.781    | 0.2767   |
| 28      | Granzyme A (pg/mL)          | 33.918    | 43.911   | 36.228   | 48.773   | 0.5566    | 34.718   | 19.313   | 37.095   | 18.455   | 0.5469   |
| 29      | Granzyme B (pg/mL)          | 442.523   | 598.019  | 470.658  | 608.885  | 0.1551    | 361.68   | 182.342  | 377.337  | 242.579  | 0.6853   |
| 30      | Perforin (pg/mL)            | 1160.17   | 254.821  | 1089.799 | 262.711  | 0.1681    | 1553.938 | 568.468  | 1306.663 | 310.501  | 0.1137   |
| 31      | Granulysin (pg/mL)          | 1362.035  | 584.072  | 1236.16  | 566.357  | 0.0177 *  | 1251.207 | 353.024  | 1195.626 | 278.356  | 0.3960   |
| 32      | sCD25 (IL-2Ra)              | 403.288   | 192.1    | 344.777  | 106.083  | 0.0371 *  | 381.585  | 148.286  | 390.705  | 169.936  | 0.7309   |
| 33      | 4-1BB (pg/mL)               | 125.825   | 148.912  | 120.596  | 138.492  | 0.4316    | 285.12   | 335.715  | 288.921  | 389.214  | 0.4609   |
| 34      | sCD27 (pg/mL)               | 16901.79  | 5130.348 | 15185.19 | 5108.296 | 0.0087 ** | 16075.84 | 4472.859 | 14340.6  | 2940.917 | 0.0645   |
| 35      | B7.2 (pg/mL)                | 119.586   | 31.025   | 112.681  | 29.667   | 0.0497 *  | 104.954  | 52.349   | 104.704  | 64.895   | 0.4609   |
| 36      | TGF- $\beta$ 1(Free Active) | 123.96    | 35.797   | 140.593  | 52.455   | 0.1756    | 141.769  | 46.861   | 156.799  | 57.856   | 0.3572   |
| 37      | CTLA-4 (pg/mL)              | 3.236     | 6.265    | 3.311    | 5.724    | 0.1309    | 6.115    | 11.253   | 7.916    | 16.871   | 0.9453   |
| 38      | PD-L1 (pg/mL)               | 26.335    | 50.125   | 24.927   | 45.844   | 0.4316    | 37.905   | 52.609   | 42.989   | 73.065   | 0.6406   |
| 39      | PD-L2 (pg/mL)               | 3409.385  | 897.79   | 3100.019 | 864.241  | 0.0024 ** | 3452.927 | 910.039  | 3168.057 | 727.724  | 0.0422 * |
| 40      | PD-1 (pg/mL)                | 21.876    | 25.595   | 20.586   | 24.29    | 0.0840    | 46.585   | 65.462   | 52.174   | 90.362   | 0.2500   |
| 41      | Tim-3 (pg/mL)               | 1135.758  | 343.528  | 1069.307 | 513.495  | 0.6250    | 1306.001 | 496.269  | 1231.905 | 602.651  | 0.3334   |
| 42      | LAG-3 (pg/mL)               | 974.04    | 887.598  | 858.48   | 843.609  | 0.0059 ** | 1523.65  | 1782.27  | 1567.275 | 2148.765 | 0.7422   |
| 43      | Galectin-9 (pg/mL)          | 20522.77  | 4604.374 | 18982.87 | 4809.372 | 0.0390 *  | 21600.66 | 5630.121 | 22487.98 | 7507.335 | 0.5870   |
| 44      | IL-8 (pg/mL)                | 45.01     | 42.048   | 23.249   | 12.161   | 0.0098 ** | 51.822   | 41.884   | 37.705   | 49.843   | 0.0391 * |
| 45      | IP-10 (pg/mL)               | 42.53     | 15.942   | 38.008   | 15.648   | 0.0730    | 33.032   | 11.838   | 34.54    | 11.069   | 0.3637   |
| 46      | Eotaxin (pg/mL)             | 26.856    | 5.633    | 25.317   | 5.982    | 0.0063 ** | 27.711   | 9.639    | 25.637   | 9.06     | 0.1025   |
| 47      | TARC (pg/mL)                | 160.8     | 92.081   | 131.36   | 50.44    | 0.0840    | 100.95   | 32.591   | 94.994   | 37.408   | 0.3976   |
| 48      | MCP-1 (pg/mL)               | 155.256   | 47.011   | 146.923  | 41.755   | 0.1211    | 167.1    | 21.484   | 143.936  | 19.07    | 0.0664   |
| 49      | RANTES (pg/mL)              | 1589.879  | 534.273  | 1393.553 | 465.832  | 0.0488 *  | 2475.471 | 1999.592 | 1363.781 | 612.868  | 0.0656   |
| 50      | MIP-1 $\alpha$ (pg/mL)      | 46.864    | 39.994   | 31.732   | 25.262   | 0.0422 *  | 50.209   | 42.623   | 45.774   | 46.875   | 0.6726   |
| 51      | MIG (pg/mL)                 | 9.197     | 8.165    | 8.51     | 10.547   | 0.4316    | 8.268    | 6.223    | 7.161    | 3.235    | 0.5443   |
| 52      | ENA-78 (pg/mL)              | 194.579   | 83.054   | 188.503  | 78.765   | 0.2754    | 190.644  | 113.32   | 188.225  | 118.503  | 0.7422   |
| 53      | MIP-3 $\alpha$ (pg/mL)      | 7.702     | 8.796    | 4.38     | 4.043    | 0.1925    | 5.156    | 2.784    | 5.856    | 4.01     | 0.2620   |
| 54      | GRO $\alpha$ (pg/mL)        | 43.306    | 11.6     | 41.594   | 11.222   | 0.0268 *  | 46.075   | 12.12    | 44.224   | 8.499    | 0.4609   |
| 55      | I-TAC (pg/mL)               | 19.15     | 16.572   | 16.576   | 11.955   | 0.3223    | 16.787   | 16.096   | 19.418   | 23.161   | 0.3828   |
| 56      | MIP-1 $\beta$ (pg/mL)       | 15.962    | 6.686    | 11.808   | 3.477    | 0.0208 *  | 18.446   | 8.274    | 14.329   | 8.97     | 0.0341 * |

\*,  $p < 0.05$ ; \*\*,  $p < 0.01$
