# Supplementary material for: A Comprehensive Analysis of Plasma Cytokines and Metabolites Shows an Association between Galectin-9 and Changes in Peripheral Lymphocyte Subset Percentages Following Coix Seed Consumption
Source: MDPI journal article supplement (doi:10.3390/nu14091696), 2022-04-19
Supplement: s1 [file s1]

Table S1

List of kits used to analyze the cytokine concentration

| Kit                           | Cytokine                                                                                                                      |
|-------------------------------|-------------------------------------------------------------------------------------------------------------------------------|
| Human Th Cytokine Panel       | IL-5, IL-13, IL-2, IL-6, IL-9, IL-10, IFN- $\gamma$ , TNF- $\alpha$ , IL-17A, IL-17F, IL-4, IL-22                             |
| Human Cytokine Panel 2        | TSLP, IL-1 $\alpha$ , IL-1 $\beta$ , GM-CSF, IFN- $\alpha$ 2, IL-23, IL-12p40, IL-12p70, IL-15, IL-18, IL-11, IL-27, IL-33    |
| Human CD8-NK Panel            | sFas, sFasL, Granzyme A, Granzyme B, Perforin, Granulysin                                                                     |
| Human Checkpoint Panel 1      | sCD25, 4-1BB, sCD27, B7.2, TGF- $\beta$ 1 (Free Active) , CTLA-4, PD-L1, PD-L2, PD-1, Tim-3, LAG-3, Galectin-9                |
| Human Proinflammatory Panel 1 | IL-8, IP-10, Eotaxin, TARC, MCP-1, RANTES, MIP-1 $\alpha$ , MIG, ENA-78, MIP-3 $\alpha$ , GRO $\alpha$ , I-TAC, MIP-1 $\beta$ |
